# Supplementary material for: LncRNAs and CircRNAs Control Myofiber-Specific Expression Profiles by Acting as CeRNAs in Mongolian Horses
Source: Research Square preprint supplement (doi:10.21203/rs.3.rs-633069/v1), 2021-06-22
Supplement: Supplementary file 1 [file 050da0cb19f4e2931614a587.docx]

**a**


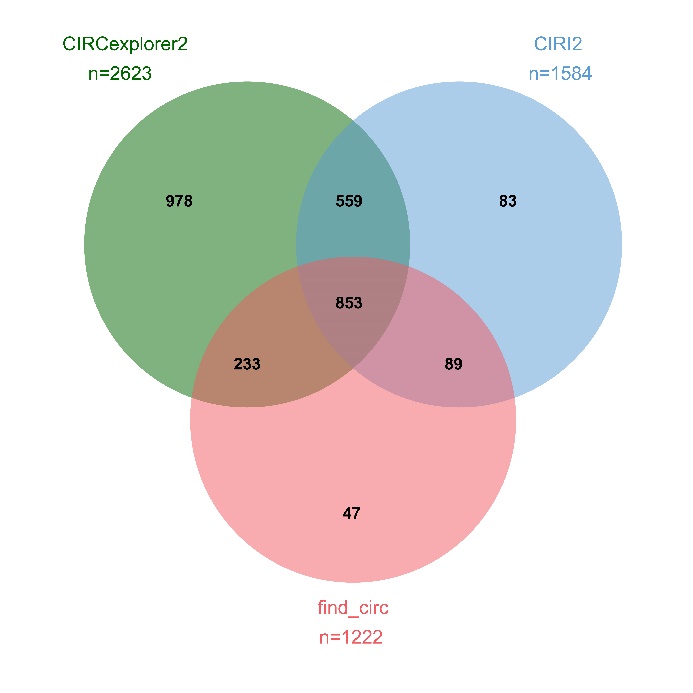


**b**


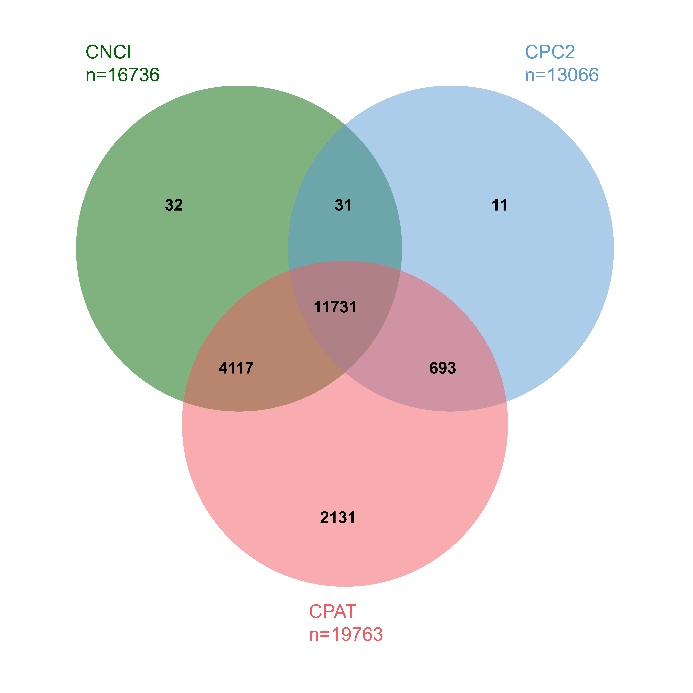


The intersection of novel lncRNAs and novel circRNAs detected by multiple software. (**a**) The intersection of CPAT, CPC2, and CNCI gives 11731 novel lncRNAs. (**b**) The intersection of find_circ, CIRCexplorer2, and CIRI2 gives 853 novel circRNAs
