# Supplementary material for: LncRNAs and CircRNAs Control Myofiber-Specific Expression Profiles by Acting as CeRNAs in Mongolian Horses
Source: Research Square preprint supplement (doi:10.21203/rs.3.rs-633069/v1), 2021-06-22
Supplement: Supplementary file 2 [file 932e096216ed2fccc24e7eca.xlsx]

## Sheet: Sheet1
	SPM1	SPM2	SPM3	GMM1	GMM2	GMM3
MYF5	269	95	93	35	22	69	SPM Higher
MYF6(MRF4)	3784	1653	2226	1010	879	1143	SPM Higher
EYA1	2185	2514	3411	2893	4021	2939	GMM Higher
EYA4	6296	8958	9027	11197	16916	6909	GMM Higher
SIX1	5755	5798	5205	3428	3142	3928	SPM Higher
SIX4	2769	1800	1881	958	1263	1172	SPM Higher
FOXO1	1135	1483	1004	1831	1812	1787	GMM Higher
FOXO3	3481	4448	4024	5112	4797	4012	GMM Higher
FOXO4	744	854	612	667	411	479	SPM Higher
MYOG	557	371	201	362	121	94	SPM Higher
